# Supplementary material
Source: publisher site journal article supplement (https://www.spandidos-publications.com/7751/downloadSupplementary)
Supplement: Supplementary file 1 [file downloadSupplementary]

## Sheet: OR
Table SV. A two-sample MR analysis was performed using miR-27a-3p as the exposure and 35 immune cell types as outcomes.
Exposure	Outcome	method	nsnp	b	se	pval	lo_ci	up_ci	or	or_lci95	or_uci95
hsa-miR-27b-3p	ebi-a-GCST90001391	MR Egger	3	-0.373243	0.389291041504352	0.513396117564965	-1.13625	0.389767446123338	0.68849791081067	0.321019491480114	1.4766373562087
		Weighted median	3	-0.0616498	0.0684083844684255	0.367480797602639	-0.19573	0.0724306439066414	0.94021210114822	0.822234024416055	1.07511823750344
		Inverse variance weighted	3	-0.0686682	0.0600242794483547	0.252620901431772	-0.186316	0.0489794160944091	0.933636435744405	0.830011469723381	1.05019873332597
		Simple mode	3	-0.0294689	0.0908614495179627	0.776468650056482	-0.207557	0.148619564064212	0.97096109640189	0.812566665704599	1.16023151147661
		Weighted mode	3	-0.106316	0.0926123653582114	0.369765962558547	-0.287836	0.0752045404983263	0.89914074848389	0.749884614436235	1.07810464439515
	ebi-a-GCST90001397	MR Egger	3	0.0224658899216837	0.394415729936524	0.963777326454332	-0.750589	0.795520720597272	1.02272014850511	0.4720884387317	2.21559440211744
		Weighted median	3	0.0384529902674375	0.0671179825013755	0.56670132644642	-0.0930983	0.170004235970133	1.03920187460749	0.911103974980411	1.18530987224695
		Inverse variance weighted	3	0.0385115576410142	0.0607896170660724	0.526392841896255	-0.0806361	0.157659207090516	1.03926273971424	0.922529346353167	1.17076713757447
		Simple mode	3	0.0401968934869721	0.0819806047088807	0.672420229661768	-0.120485	0.200878878716378	1.0410157232309	0.886490303272636	1.22247669490939
		Weighted mode	3	0.0372758099785085	0.0833262509913167	0.698406441044733	-0.126044	0.200595261921489	1.03797926640081	0.881576372219153	1.22213002914979
	ebi-a-GCST90001402	MR Egger	3	0.324985298710499	0.395049706827396	0.561753110121197	-0.449312	1.0992827240922	1.38401029909511	0.638066909908729	3.00201198064845
		Weighted median	3	0.0543723196010642	0.0723270083997659	0.45219733211635	-0.0873886	0.196133256064605	1.0558776529268	0.91632092866707	1.21668902572373
		Inverse variance weighted	3	0.0578508624012353	0.0609006570520737	0.342151983646357	-0.0615144	0.1772161502233	1.05955696414497	0.940339380850298	1.19388912464024
		Simple mode	3	0.0256832036989776	0.0957329195099054	0.813621531178795	-0.161953	0.213319725938392	1.02601585895368	0.850480905303571	1.23778033846474
		Weighted mode	3	0.0907727018281079	0.0837534998562776	0.391717823567155	-0.0733842	0.254929561546412	1.09502008090694	0.929243785117406	1.29037072595319
	ebi-a-GCST90001409	MR Egger	3	-0.22904	0.390266624615122	0.66213496505404	-0.993963	0.53588260619746	0.79529673845822	0.370107208617529	1.70895591189608
		Weighted median	3	-0.0608822	0.0695067407836664	0.381074306057505	-0.197115	0.0753509672755033	0.940934033259169	0.821095826910201	1.07826251934197
		Inverse variance weighted	3	-0.0627868	0.060148633980288	0.296550106934079	-0.180678	0.0551045617280834	0.939143714524333	0.834704020468106	1.05665109416382
		Simple mode	3	-0.0412641	0.0797371307512931	0.656355877257626	-0.197549	0.11502064514218	0.959575642673172	0.820739999384314	1.12189659904765
		Weighted mode	3	-0.0782532	0.0816266795179082	0.438888719569377	-0.238241	0.0817351132261178	0.924730274960509	0.788012386385807	1.08516832501903
	ebi-a-GCST90001556	MR Egger	3	0.27891373910736	0.392894206172649	0.606991530980101	-0.491159	1.04898638320575	1.32169332850576	0.611916829636922	2.85475602240445
		Weighted median	3	0.0454793286278362	0.0700975024339956	0.516467020694013	-0.0919118	0.182870433398468	1.04652937119224	0.912185622529326	1.20065883271781
		Inverse variance weighted	3	0.0473371449861912	0.0604617969015515	0.433670255835428	-0.071168	0.165842266913232	1.04847543773494	0.931305441148881	1.18038690096918
		Simple mode	3	0.0191990525781214	0.0849147519557572	0.842129462609665	-0.147234	0.185631966411405	1.01938453954445	0.863092110008589	1.20397907408968
		Weighted mode	3	0.0652055168075197	0.081706651915122	0.508546766018979	-0.0949395	0.225350554561159	1.06737836603843	0.90942793414608	1.25276180058909
	ebi-a-GCST90001594	MR Egger	3	-0.192704	0.391184407874314	0.708604654170885	-0.959425	0.574017857956535	0.82472640209272	0.383113104682469	1.77538598913901
		Weighted median	3	0.113333265339589	0.0671502570948491	0.0914580312250153	-0.0182812	0.244947769245493	1.12000512964824	0.981884849636106	1.2775545838224
		Inverse variance weighted	3	0.113908670672066	0.0602819321226321	0.0588116287511458	-0.00424392	0.232061257632425	1.12064977201979	0.995765076398537	1.26119698440334
		Simple mode	3	0.150767212186852	0.0896869636067395	0.234775441859317	-0.0250192	0.326553660856062	1.16272595814213	0.975291150676869	1.38618263151396
		Weighted mode	3	0.0866187650308312	0.0787704191859539	0.386166581238469	-0.0677713	0.241008786635301	1.09048087102166	0.934474203962832	1.2725322165356
	ebi-a-GCST90001639	MR Egger	3	0.216871902256037	0.393864639256669	0.679574440624104	-0.555103	0.988846595199109	1.24218497085345	0.574013254946999	2.68813217903246
		Weighted median	3	0.0251773370069741	0.0673116219765276	0.708373474538194	-0.106753	0.157108116080968	1.02549696296233	0.898747238936266	1.17012211607978
		Inverse variance weighted	3	0.02321899427575	0.060672726540353	0.701947814245757	-0.0956995	0.142137538294842	1.0234906536009	0.908737005323291	1.15273518286594
		Simple mode	3	0.00919630902382915	0.0832495604391142	0.9221254192501	-0.153973	0.172365447484493	1.00923872499742	0.857295313891493	1.1881119464084
		Weighted mode	3	0.0461583534031098	0.0782121917033726	0.61487723221591	-0.107138	0.19945424914172	1.04724023188203	0.898402096169452	1.22073635841725
	ebi-a-GCST90001649	MR Egger	3	0.181109659232704	0.401481311167099	0.730218817719829	-0.605794	0.968013029120217	1.19854660378804	0.545641173510524	2.63270814445631
		Weighted median	3	-0.040477	0.0686665046453719	0.555544586830091	-0.175063	0.0941093567384063	0.960331259206867	0.839403850010266	1.09867988739695
		Inverse variance weighted	3	-0.0262602	0.0618600689872092	0.67119445161445	-0.147506	0.0949855629443858	0.974081627609537	0.862857340989111	1.09964297940465
		Simple mode	3	-0.0577657	0.0911655072072895	0.591117273818131	-0.23645	0.120918690672321	0.943871067262942	0.78942527555051	1.1285331483652
		Weighted mode	3	-0.057918	0.0806790041027771	0.547359518641768	-0.216049	0.100212854296593	0.943727335808282	0.80569594928309	1.10540618349177
	ebi-a-GCST90001650	MR Egger	3	0.169888524516713	0.393636196666704	0.740617425384973	-0.601638	0.941415469983452	1.18517272625371	0.547913187831045	2.56360756092768
		Weighted median	3	0.053040570049056	0.0715149499475095	0.458286646926425	-0.0871287	0.193209871946175	1.05447242424955	0.916559097691764	1.21313737030481
		Inverse variance weighted	3	0.0579734677374553	0.060651324017743	0.339148858888652	-0.0609031	0.176850062812232	1.05968687944679	0.940914384242989	1.19345213685424
		Simple mode	3	0.0408288466013052	0.081884148826799	0.667486469745068	-0.119664	0.201321778301831	1.04167380427555	0.887218416552788	1.22301824924903
		Weighted mode	3	0.0400567263341699	0.0818737246969789	0.673059742828825	-0.120416	0.200529226740249	1.0408698172468	0.886551754845217	1.2220493282364
	ebi-a-GCST90001659	MR Egger	3	-0.305991	0.391735926614359	0.577844600051554	-1.07379	0.461810978997354	0.736392925038898	0.341709658809797	1.58694530888044
		Weighted median	3	-0.0196769	0.0658041752087966	0.764923051244644	-0.148653	0.109299269367581	0.980515412898786	0.861868047268344	1.11549613421594
		Inverse variance weighted	3	-0.00121579	0.0602172392683813	0.983891759364018	-0.119242	0.116809999452363	0.998784949258979	0.887593351407401	1.12390586667247
		Simple mode	3	-0.0262304	0.0845650091319018	0.785762100785841	-0.191978	0.13951703876068	0.974110648985042	0.825325192953491	1.14971839532776
		Weighted mode	3	-0.03041	0.0831303085726417	0.749574255169804	-0.193345	0.132525358580979	0.970047687597592	0.824197205186751	1.14170796781605
	ebi-a-GCST90001672	MR Egger	3	-0.490576	0.414621393944464	0.446706490318571	-1.30323	0.322082020117077	0.612273676860688	0.271651891190251	1.3799979589097
		Weighted median	3	0.0428290148035545	0.0732974193884628	0.559006262044559	-0.100834	0.186491956804942	1.04375941218397	0.904083164043613	1.20501492987659
		Inverse variance weighted	3	0.047617578700276	0.0637426809341448	0.45504655289733	-0.0773181	0.1725532333312	1.04876950682758	0.925595397161869	1.18833507796606
		Simple mode	3	0.0995747870264101	0.100998613591646	0.428114222259295	-0.0983825	0.297532069666036	1.10470108495989	0.906302180839733	1.34653155747771
		Weighted mode	3	0.0066901732307143	0.0948382690316166	0.950180527861591	-0.179193	0.192573180532683	1.00671260243015	0.835944685236746	1.21236522199393
	ebi-a-GCST90001810	MR Egger	3	0.108455930896839	0.529200491313867	0.871311205752316	-0.928777	1.14568889387202	1.11455578998196	0.39503653208031	3.14460691126602
		Weighted median	3	-0.121554	0.0928759293161743	0.19060768061835	-0.303591	0.0604823329562037	0.885542800132294	0.738162484465195	1.06234882884125
		Inverse variance weighted	3	-0.121225	0.081224127393189	0.135574542950967	-0.280424	0.0379742719051932	0.885834608623046	0.75546312478874	1.03870450864664
		Simple mode	3	-0.148513	0.111956398948116	0.315866295255025	-0.367948	0.0709213682965814	0.861988651566034	0.692153369580148	1.07349681166667
		Weighted mode	3	-0.103187	0.110094331941167	0.447566060036492	-0.318972	0.112597846075467	0.901958251346232	0.726895949257554	1.11918175909838
	ebi-a-GCST90001819	MR Egger	3	-0.118016	0.385835644300247	0.811028926616637	-0.874254	0.63822160096817	0.888681600881055	0.417173062752419	1.89311117677129
		Weighted median	3	0.134817529007538	0.0665362704179824	0.0427416182031631	0.00440643898829204	0.265228619026783	1.14432795864126	1.00441616161605	1.30372899896512
		Inverse variance weighted	3	0.130551123581838	0.0595218770760957	0.0282836057211467	0.01388824451269	0.247214002650985	1.13945619148639	1.01398513420348	1.2804531038185
		Simple mode	3	0.168188918888071	0.0885824478044476	0.198019553522695	-0.00543268	0.341810516584788	1.18316011082799	0.994582051503782	1.40749357555562
		Weighted mode	3	0.090965327659018	0.0899090293843694	0.418154216079912	-0.0852564	0.267187025252382	1.09523103037639	0.91827683564969	1.30628473171781
	ebi-a-GCST90001820	MR Egger	3	-0.0673413	0.391302521298362	0.891503515503491	-0.834294	0.699611623777431	0.934876056879539	0.434180792209623	2.01297076565439
		Weighted median	3	-0.146233	0.0722070828736669	0.0428485540802828	-0.287758	-0.00470669	0.86395674716927	0.749942715268955	0.995304368963187
		Inverse variance weighted	3	-0.155315	0.0603396198643461	0.0100525826461961	-0.273581	-0.0370494	0.856145359298296	0.760650903764081	0.963628482686122
		Simple mode	3	-0.137412	0.0852647992964296	0.248365940814879	-0.304531	0.0297073697784466	0.871611364926736	0.73746942927077	1.03015303593081
		Weighted mode	3	-0.141114	0.0853149962675987	0.23994298331217	-0.308331	0.0261037018482883	0.868390578034248	0.73467203993307	1.02644738744564
	ebi-a-GCST90001821	MR Egger	3	0.0333325130123394	0.391844256482678	0.945975541651785	-0.734682	0.801347255718388	1.03389426538805	0.479657855783768	2.22854132192966
		Weighted median	3	-0.079904	0.0671218669164152	0.23387670038955	-0.211463	0.0516548508597458	0.923204962150442	0.809399335553914	1.05301223351749
		Inverse variance weighted	3	-0.0862719	0.0604145051736913	0.153291795580387	-0.204684	0.0321405035413573	0.917344746863776	0.814904494932712	1.0326625878632
		Simple mode	3	-0.0780523	0.0849996065260544	0.455416903344878	-0.244652	0.0885469012416103	0.924916026688098	0.782977314196229	1.09258549502509
		Weighted mode	3	-0.0754016	0.0805821460266076	0.448200930788421	-0.233343	0.0825393873934039	0.927370961896892	0.791882208372611	1.08604144893845
	ebi-a-GCST90001824	MR Egger	3	0.0907356190725403	0.388422384150557	0.853905195252998	-0.670572	0.852043492007633	1.09497947529782	0.511415834346174	2.34443278991615
		Weighted median	3	-0.0920758	0.0699797787053012	0.188258284814806	-0.229236	0.045084538838901	0.912035989583793	0.795140704110212	1.04611629362744
		Inverse variance weighted	3	-0.0967101	0.0598865565348469	0.106334787628399	-0.214088	0.0206675240197826	0.907819120440423	0.807277521031831	1.02088257627172
		Simple mode	3	-0.0974967	0.0806280566214004	0.350128365701434	-0.255528	0.0605342620951666	0.907105308798746	0.774507667018297	1.06240399713361
		Weighted mode	3	-0.082332	0.0812058870573589	0.417349028281428	-0.241496	0.0768315301776629	0.920966139387035	0.785452301331817	1.07986013722193
	ebi-a-GCST90001825	MR Egger	3	-0.166269	0.393745261900911	0.745631917748779	-0.93801	0.605471856970917	0.846818531037561	0.391406127156441	1.83211650190135
		Weighted median	3	-0.110667	0.0693394686498366	0.110485982520486	-0.246572	0.0252386936198874	0.895237113121018	0.78147507494978	1.02555988591288
		Inverse variance weighted	3	-0.0973995	0.0607087834699514	0.108631948908661	-0.216389	0.0215897073717607	0.907193502456654	0.805422154228527	1.02182445141192
		Simple mode	3	-0.111697	0.0805109210694876	0.299704529143516	-0.269499	0.0461042124832533	0.894315021519653	0.763762350233073	1.04718353486739
		Weighted mode	3	-0.112618	0.0869899188753481	0.324772484809647	-0.283118	0.0578823105607591	0.893491970998372	0.753430748609448	1.05959028578535
	ebi-a-GCST90001853	MR Egger	3	-0.397501	0.431297595766612	0.525945798368863	-1.24284	0.447842550525844	0.671997447266535	0.28856237125373	1.56493227849057
		Weighted median	3	0.169285287756558	0.078656627999077	0.0313811122363085	0.0151182968783673	0.323452278634749	1.18445800209372	1.01523315642556	1.3818902090071
		Inverse variance weighted	3	0.158395538635647	0.0664875807915157	0.017203346427866	0.0280798802842764	0.288711196987018	1.17162952781347	1.02847783624216	1.33470620568746
		Simple mode	3	0.242504319667747	0.116271551613913	0.172328118332682	0.0146120785044769	0.470396560831018	1.27443675429487	1.01471935680637	1.60062881406882
		Weighted mode	3	0.0666104887156825	0.0869244305725029	0.523586557371957	-0.103761	0.236982372637788	1.06887905662529	0.901440359753694	1.26741877632853
	ebi-a-GCST90001855	MR Egger	3	-0.320674	0.433481351181084	0.594525483392885	-1.1703	0.528949507508205	0.725659820475878	0.310274655236546	1.6971485300713
		Weighted median	3	0.119502537359906	0.0767278403993809	0.119355141543826	-0.030884	0.269889104542692	1.12693610350606	0.969588009849478	1.30981918968097
		Inverse variance weighted	3	0.106285833723471	0.0668313736046152	0.111754050686855	-0.0247037	0.237275325988517	1.11213971811609	0.97559897961932	1.26779012529714
		Simple mode	3	0.170865266582764	0.107597958878407	0.253212251981688	-0.0400267	0.381757265984442	1.18633089983733	0.96076375488554	1.4648564714814
		Weighted mode	3	0.0352538992959755	0.0839533851941964	0.7153533354166	-0.129295	0.1998025342766	1.03588268529795	0.878714938726158	1.2211615967923
	ebi-a-GCST90001857	MR Egger	3	-0.380861	0.432469298101901	0.540341194577793	-1.2285	0.466778588508479	0.683272696850628	0.292731035231024	1.59484824659293
		Weighted median	3	0.163929936096501	0.0768180370428729	0.0328425196949734	0.0133665834924702	0.314493288700532	1.17813176769048	1.0134563156279	1.36956516096261
		Inverse variance weighted	3	0.151401466742462	0.0666641602371257	0.02314047794605	0.0207397126776957	0.282063220807228	1.16346365629749	1.02095627507487	1.32586253943721
		Simple mode	3	0.232111838985775	0.106877693701936	0.162010650431588	0.0226315593299812	0.441592118641569	1.26126077906705	1.02288959598271	1.55518128159719
		Weighted mode	3	0.0630878303426067	0.097025685056748	0.582264297140717	-0.127083	0.253258173053833	1.0651203850115	0.880661004173771	1.28821581651774
	ebi-a-GCST90001860	MR Egger	3	-0.1562	0.432679171861584	0.779444868444095	-1.00425	0.691850756676311	0.8553877362326	0.366318686236777	1.99740883222155
		Weighted median	3	0.200551589558173	0.0784032779773328	0.0105291521080453	0.0468811647226009	0.354222014393746	1.22207665700859	1.04799746261036	1.42507153775482
		Inverse variance weighted	3	0.18828647130902	0.0667011647811793	0.00476008649508114	0.0575521883379085	0.319020754280131	1.20717928805113	1.05924054921598	1.37577987793073
		Simple mode	3	0.240764998364938	0.102991506658888	0.144383137933727	0.0389016453135167	0.442628351416359	1.2722220259195	1.03966822237924	1.55679364666041
		Weighted mode	3	0.130164764337118	0.0927762401849667	0.295714166886691	-0.0516767	0.312006195099653	1.13901603708719	0.949635866367814	1.36616315652016
	ebi-a-GCST90001862	MR Egger	3	0.00988966747545278	0.431475782431697	0.985410871411521	-0.835803	0.85558220104158	1.00993873184689	0.433526278123259	2.35274375177441
		Weighted median	3	0.144481301695522	0.0742480357653377	0.051663437599888	-0.00104485	0.290007451795584	1.15544008999116	0.998955697259492	1.33643744684703
		Inverse variance weighted	3	0.140851871188634	0.0665640091482097	0.0343417056195406	0.0103864132581427	0.271317329119125	1.15125	1.01044053927776	1.31169124217582
		Simple mode	3	0.160701701022651	0.091621464189258	0.221525824245974	-0.0188764	0.340279770833597	1.17433461374684	0.981300674135074	1.40534070891112
		Weighted mode	3	0.11948232701908	0.0875321225065692	0.305520399019904	-0.0520806	0.291045287131956	1.12691332797347	0.949252322605368	1.33782516884312
	ebi-a-GCST90001882	MR Egger	3	-0.0175668	0.627805254082521	0.982191199456205	-1.24807	1.21293149227037	0.982586591056528	0.287059690579855	3.36332979030893
		Weighted median	3	0.0950858966724807	0.106397783325886	0.371491491042059	-0.113454	0.303625551991218	1.09975331621951	0.892745477216153	1.35476167329042
		Inverse variance weighted	3	0.10884759350922	0.0966763029586122	0.260208970303986	-0.080638	0.2983331473081	1.11499240531167	0.922527622626063	1.34761066596987
		Simple mode	3	0.0870352070813619	0.122845518436184	0.552085368881319	-0.153742	0.327812423216283	1.09093508768255	0.857493217963694	1.38792860468702
		Weighted mode	3	0.0892791166442098	0.13643536201807	0.580066251013102	-0.178134	0.356692426199626	1.09338579591376	0.836830119283831	1.42859640344816
	ebi-a-GCST90001932	MR Egger	3	0.0861736952071742	0.43090308291758	0.874343916054823	-0.758396	0.930743737725632	1.0899956388818	0.468417003203917	2.53639488885958
		Weighted median	3	0.00934158136098988	0.0746015108573099	0.900349594569737	-0.136877	0.155560542641317	1.00938535011578	0.872077153747175	1.16831266666085
		Inverse variance weighted	3	0.00361889102418949	0.0664854400899226	0.956591516983772	-0.126693	0.133930353600438	1.00362544711652	0.881004476807499	1.14331318922449
		Simple mode	3	0.0107679125723535	0.0865202176882127	0.912335515359085	-0.158812	0.18034753924125	1.01082609519052	0.853156981280209	1.19763351544624
		Weighted mode	3	0.0152421870052453	0.0871079134980777	0.877206454391002	-0.155489	0.185973697461478	1.01535894158172	0.855996215965697	1.20439058143135
	ebi-a-GCST90001938	MR Egger	3	-0.383788	0.40800543809677	0.51946509542976	-1.18348	0.415902414133951	0.681275675753319	0.30621160291961	1.51573794705288
		Weighted median	3	0.00580990864643778	0.0716075006391903	0.935334212945235	-0.134541	0.146160609899251	1.00582681889882	0.874117220629574	1.15738206014002
		Inverse variance weighted	3	-0.0109447	0.0628974571999695	0.861858678312153	-0.134224	0.112334315623544	0.989114974838051	0.874394426171991	1.11888685948284
		Simple mode	3	0.0466636467459307	0.0971211887676076	0.678315950285309	-0.143694	0.237021176730442	1.04776952911346	0.86615285138661	1.26746795831838
		Weighted mode	3	0.0491244154746358	0.0949488682330745	0.656428792857804	-0.136975	0.235224197211462	1.05035102253207	0.871991706282605	1.2651923895439
	ebi-a-GCST90001969	MR Egger	3	0.0813791142474447	0.418419898429346	0.877709569251258	-0.738724	0.901482115168963	1.08478207496003	0.477723155593626	2.46325122903524
		Weighted median	3	0.0279611511000377	0.0747296676599496	0.708282308457931	-0.118509	0.174431299713539	1.0283557331564	0.888243823635088	1.19056894714765
		Inverse variance weighted	3	0.0162173540629287	0.0645747936676174	0.801705387674871	-0.110349	0.142783949651459	1.01634956910844	0.895521327442357	1.15348056486506
		Simple mode	3	0.0336163373323162	0.0889478891083599	0.741821214810813	-0.140722	0.207954199984702	1.03418775137212	0.868731197658761	1.23115678125817
		Weighted mode	3	0.0333557068837311	0.0874029544626618	0.739465430916453	-0.137954	0.204665497630548	1.03391824567678	0.871138690150873	1.22711452358775
	ebi-a-GCST90001971	MR Egger	3	-0.0297927	0.384756117215999	0.950802916023445	-0.783915	0.724329245256919	0.970646684580056	0.4566149815916	2.06334663615774
		Weighted median	3	0.104170228138166	0.0696522702523784	0.134764314490063	-0.0323482	0.240688677832828	1.10978935621283	0.968169385922603	1.27212493296266
		Inverse variance weighted	3	0.115630855462156	0.0593800484390384	0.0514986028947531	-0.000754039	0.232015750402671	1.12258140084565	0.999246244737967	1.2611395921283
		Simple mode	3	0.102214797158067	0.0806207459891003	0.332474915074463	-0.0558019	0.260231459296704	1.10762136009851	0.945726498866429	1.29723030793467
		Weighted mode	3	0.100551752032077	0.080685574890277	0.33886121293948	-0.057592	0.25869547881702	1.10578086663019	0.944035059002088	1.2952393169571
	ebi-a-GCST90001972	MR Egger	3	0.0105851345607678	0.390733429223899	0.982757917075823	-0.755252	0.776422655839609	1.0106413552905	0.469892005262383	2.1736823303752
		Weighted median	3	0.0899827832306057	0.0699109249186768	0.198057283117214	-0.0470426	0.227008196071212	1.09415544572106	0.954046726083617	1.25484015265738
		Inverse variance weighted	3	0.0958611853851819	0.0603027765504527	0.111910441314029	-0.0223323	0.214054627424069	1.10060627315355	0.977915262214375	1.23869031940663
		Simple mode	3	0.0887206846693105	0.0802669567185132	0.384194817871625	-0.0686025	0.246043919837596	1.09277538477683	0.93369770402825	1.2789557438368
		Weighted mode	3	0.0874602583812999	0.0821624904395565	0.398620066106232	-0.0735782	0.248498739642831	1.09139888962254	0.929063468928603	1.28209920646537
	ebi-a-GCST90002014	MR Egger	3	-0.305185	0.440944052374637	0.614580257895215	-1.16944	0.559065356389241	0.736987029303093	0.310542245991708	1.74903700984857
		Weighted median	3	0.174544997471061	0.081063034764678	0.0313028948654772	0.0156614493322925	0.33342854560983	1.19070431986276	1.01578473258719	1.39574531084827
		Inverse variance weighted	3	0.166238510148543	0.0679838989692688	0.0144746561990549	0.0329900681687758	0.299486952128309	1.18085471397149	1.03354027424276	1.34916644301096
		Simple mode	3	0.2377129046296	0.112222346816638	0.168323058653636	0.0177571048689894	0.457668704390211	1.26834500457015	1.01791569959263	1.58038534159739
		Weighted mode	3	0.0888056732140504	0.0929563125883207	0.440223534880167	-0.0933887	0.271000045887159	1.09286826211321	0.910839388701429	1.31127513055528
	ebi-a-GCST90002030	MR Egger	3	-0.515713	0.428877062818786	0.441639646817177	-1.35631	0.324885904260362	0.597074645621123	0.257609042630371	1.38387274298872
		Weighted median	3	0.0540884798607855	0.0776299483212987	0.485960766720892	-0.0980662	0.206243178570531	1.05557799541739	0.906588868494858	1.2290520467776
		Inverse variance weighted	3	0.0792867416091137	0.0700793916601252	0.257893267780313	-0.0580689	0.216642349262959	1.08251467957309	0.943584964234901	1.24189985630114
		Simple mode	3	0.0586148090011782	0.109039890117393	0.644694068338902	-0.155103	0.272332993631269	1.06036671835028	0.856326649601923	1.31302415720406
		Weighted mode	3	0.0303345686912488	0.082422135851465	0.748145929886318	-0.131213	0.19188195496012	1.03079934945735	0.877031106893017	1.21152749371216
	ebi-a-GCST90002039	MR Egger	3	0.336158645306683	0.43445170263902	0.580766136791311	-0.515367	1.18768398247916	1.39956104099012	0.597281536176311	3.27947707876097
		Weighted median	3	0.123895298638572	0.0745357499918281	0.0964673690474809	-0.0221948	0.269985368622555	1.1318973536009	0.97804972043849	1.30994528428915
		Inverse variance weighted	3	0.125292652328291	0.0669805967369676	0.0614031372920679	-0.00598932	0.256574621932748	1.13348012012912	0.994028582930051	1.29249521069187
		Simple mode	3	0.101871441752217	0.0928242707508685	0.38692237632707	-0.0800641	0.283807012423919	1.10724111759978	0.923057149830908	1.32817658443812
		Weighted mode	3	0.150172719302719	0.0919040262591535	0.243868091206528	-0.0299592	0.33030461077066	1.16203493125945	0.970485155547247	1.39139189687629
	ebi-a-GCST90002059	MR Egger	3	0.180305335004106	0.413700991810129	0.738341631150542	-0.630549	0.991159278951959	1.19758297130394	0.532299696514393	2.69435617293913
		Weighted median	3	0.138360284270167	0.0701129950282955	0.0484511444123275	0.000938814014707606	0.275781754525626	1.14838922232277	1.00093925483852	1.31756028107805
		Inverse variance weighted	3	0.137276829120284	0.0638682350038272	0.0316046340842622	0.0120950885127825	0.262458569727785	1.14714566789515	1.01216852989049	1.30012260261933
		Simple mode	3	0.137235519041601	0.0847157843890342	0.246676053419397	-0.0288074	0.303278456444108	1.14709828019615	0.971603559456526	1.35429152314446
		Weighted mode	3	0.142518760866661	0.0909135212222773	0.257494543542017	-0.0356717	0.320709262462324	1.1531747153115	0.96495699758032	1.37810485583122
